# Supplementary material for: Relaxor induced performance tuning around morphotropic phase boundary in Ba0.86Sr0.14Ti0.94Sn0.06 modified BNT-based ceramics
Source: Royal Society of Chemistry journal article supplement (doi:10.1039/d4tc02605e), 2024-01-01
Supplement: d4tc02605e1.pdf [file d4tc02605e1.pdf]

***Supplementary Information***

***for***

**Relaxor induced performance tuning around morphotropic phase boundary in**

**Ba<sub>0.86</sub>Sr<sub>0.14</sub>Ti<sub>0.94</sub>Sn<sub>0.06</sub> modified BNT-based ceramics**

Xilong Song, Jiaqing Feng, Yiting Zhang, Zixin Liu, Chen Liao, Lin Zhao, Jian Ma,

Bo Wu, Hong Tao\*

Sichuan Prov Key Lab Informat Mat, Southwest Minzu University, Chengdu 610041,

China.

\* Corresponding author: taohongscu@163.com;

## Experimental procedure

(1- $x$ ) Bi<sub>0.51</sub>Na<sub>0.5</sub>TiO<sub>3-x</sub>Ba<sub>0.86</sub>Sr<sub>0.14</sub>Ti<sub>0.94</sub>Sn<sub>0.06</sub>O<sub>3</sub> [abbreviated as (1- $x$ ) BNT- $x$ BSTS,  $x$  = 0, 0.02, 0.04, 0.06, 0.08, and 0.10] ceramics were synthesized by the conventional solid state reaction method. Raw materials including Bi<sub>2</sub>O<sub>3</sub> (99.0 %), Na<sub>2</sub>CO<sub>3</sub> (99.8 %), TiO<sub>2</sub> (98 %), BaCO<sub>3</sub> (99.0 %), SrCO<sub>3</sub> (99.0 %), and SnO<sub>2</sub> (99.5 %) were produced by Sinopharm Chemical Reagent Co., Ltd. (China). First, raw materials were weighed according to the corresponding formula, and then they were ball milled for 24 h with both ZrO<sub>2</sub> ball and ethyl alcohol as the media. Next, the dry powders were calcined at 850 °C for 6 hours in a sealed alumina crucible. The calcined powders were pressed into disks with a diameter of about 10 mm and a thickness of about 1.0 mm under a pressure of 10 MPa after being mixed with a binder of 8 wt% polyvinyl alcohol (PVA). After the removal of PVA, the disks were sintered at 1150-1200 °C for 3 h in the air atmosphere. To characterize their electrical properties, the silver paste was covered on both sides of the samples and fired at 600 °C for 10 min to form the electrodes. All samples were poled under a dc voltage of 3 kV for 15 min at room temperature in a silicone oil bath.

The crystal structures of the sintered samples were determined by X-ray diffraction (XRD) using Cu  $K_{\alpha}$  radiation (XRD, Bruker D8 Advanced XRD, USA). The microstructure of the sintered samples was characterized by field emission scanning electron microscopy (FE-SEM, Zeiss Supra 55, Germany). A ferroelectric tester (TF Analyzer 2000E, Germany) was used to measure the polarization versus electric field hysteresis loops ( $P$ - $E$ ) and the strain-electric field curves ( $S$ - $E$ ). The  $d_{33}$  values were

measured by a  $d_{33}$  tester (ZJ-3A, China) for the poled samples. The curves of dielectric constant ( $\epsilon_r$ ) and dielectric loss ( $\tan\delta$ ) against different temperatures (-150 °C ~ 500 °C) were measured by an LCR analyzer (DMS-2000, China).

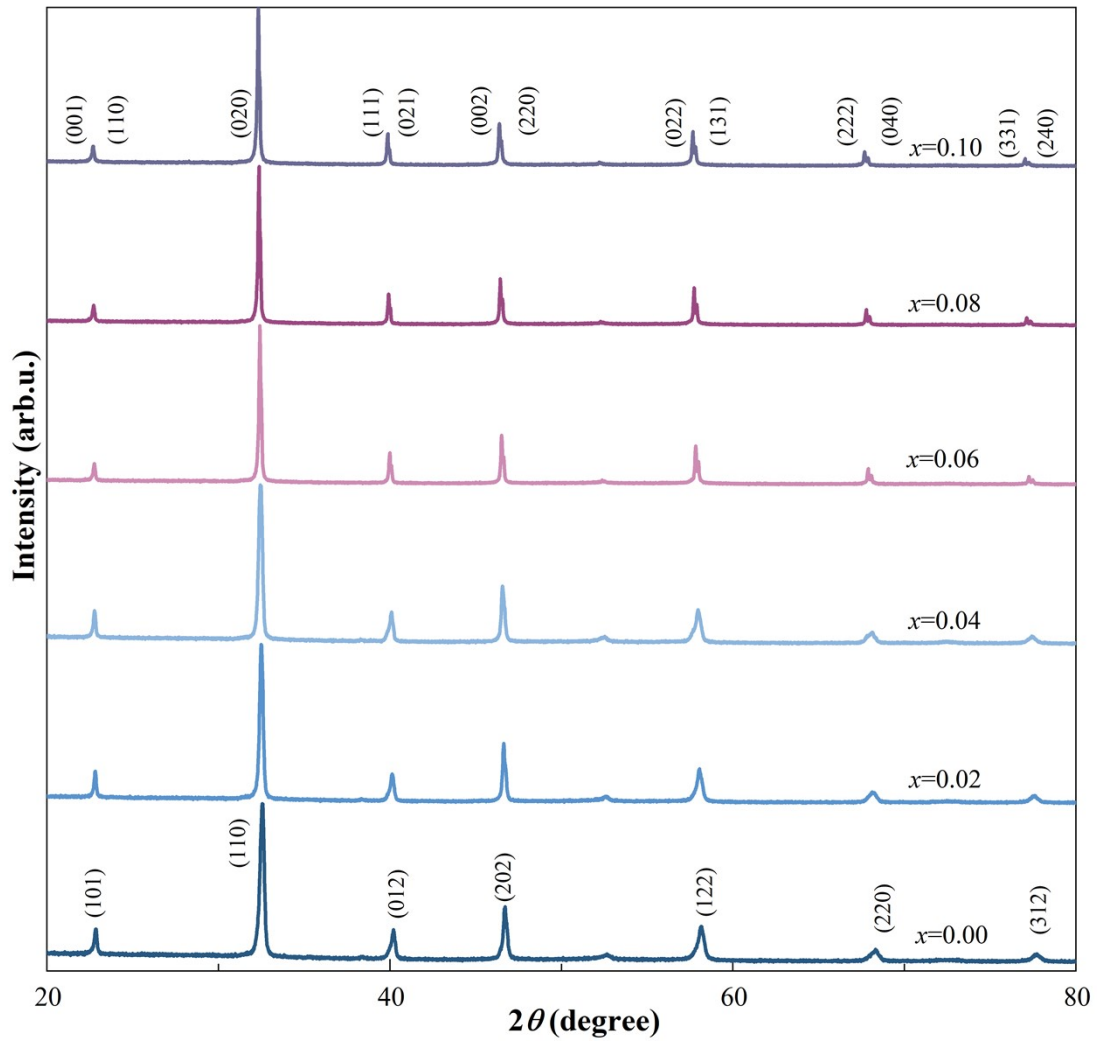

**FIGURE S1** XRD patterns of (1-x) BNT-xBSTS ceramics.

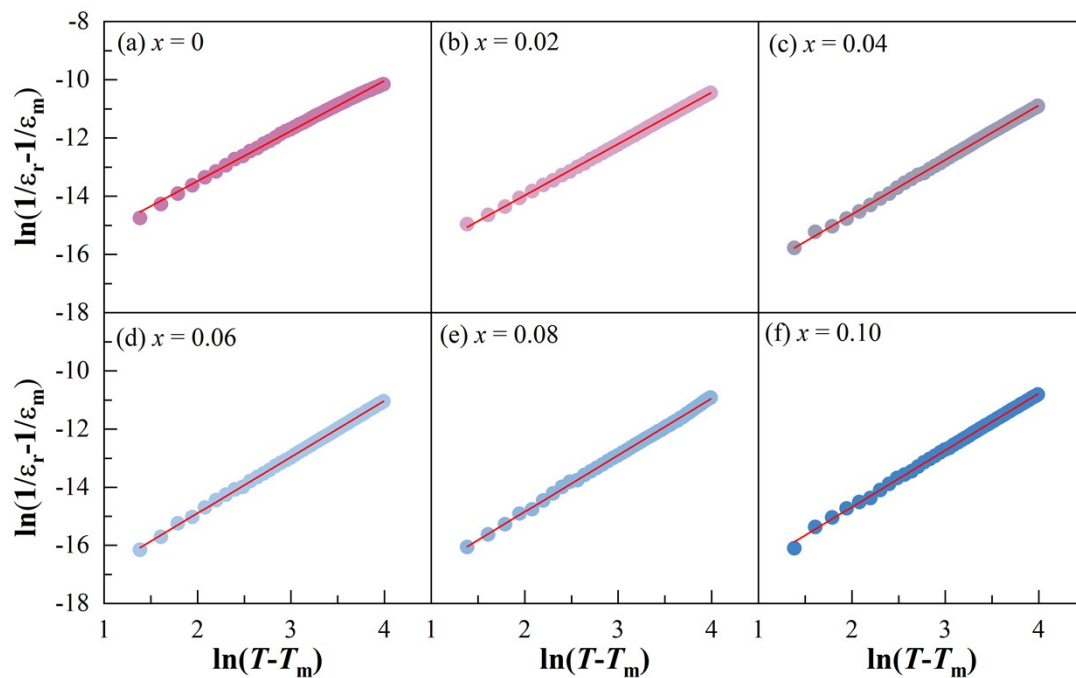

**FIGURE S2** The diffusive factor fitting curve of  $(1-x)$  BNT- $x$ BSTS ceramics: (a)  $x = 0$ , (b)  $x = 0.02$ , (c)  $x = 0.04$ , (d)  $x = 0.06$ , (e)  $x = 0.08$ , and (f)  $x = 0.10$ .

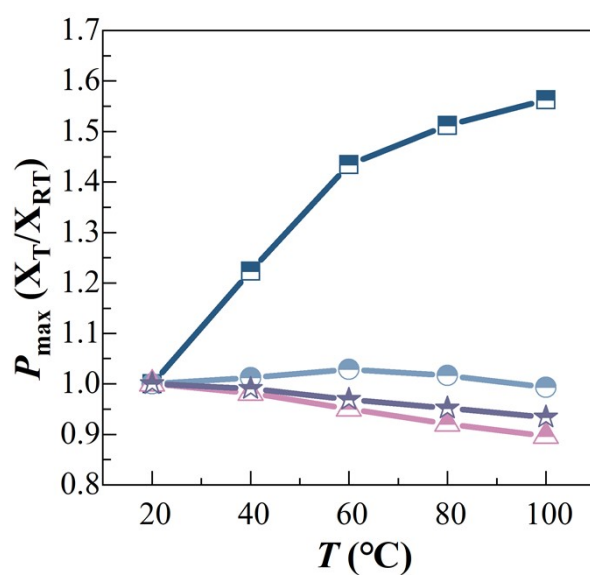

**FIGURE S3**  $P_{\max}$  of the  $(1-x)$  BNT- $x$ BSTS ceramics as a function of temperature.

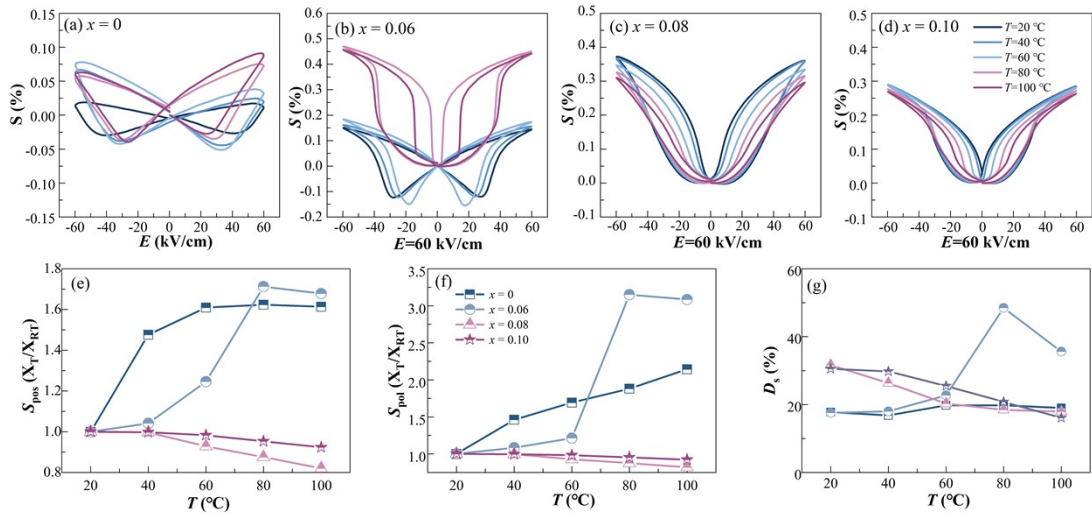

**FIGURE S4** Bipolar  $S$ - $E$  curves of the (1-x) BNT-xBSTS ceramics as a function of temperature: (a)  $x = 0$ , (b)  $x = 0.06$ , (c)  $x = 0.08$ , and (d)  $x = 0.10$ ; (e)  $S_{\text{pos}}$ , (f)  $S_{\text{pol}}$ , (g)  $D_s$ .

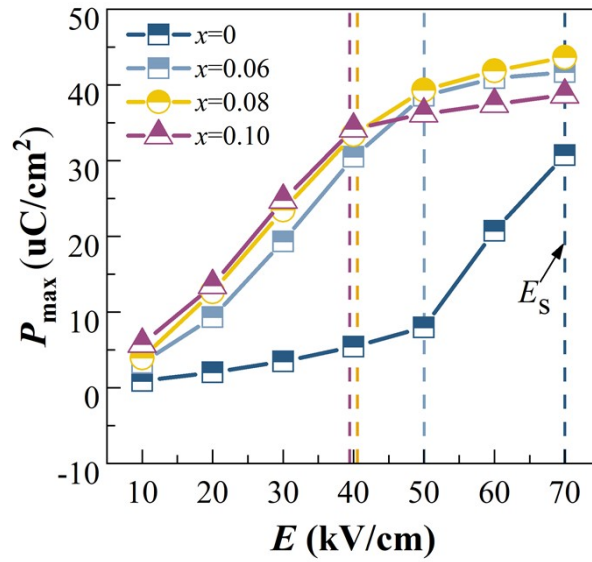

**FIGURE S5**  $P_{\text{max}}$  of the (1-x) BNT-xBSTS ceramics as a function of the electric field.

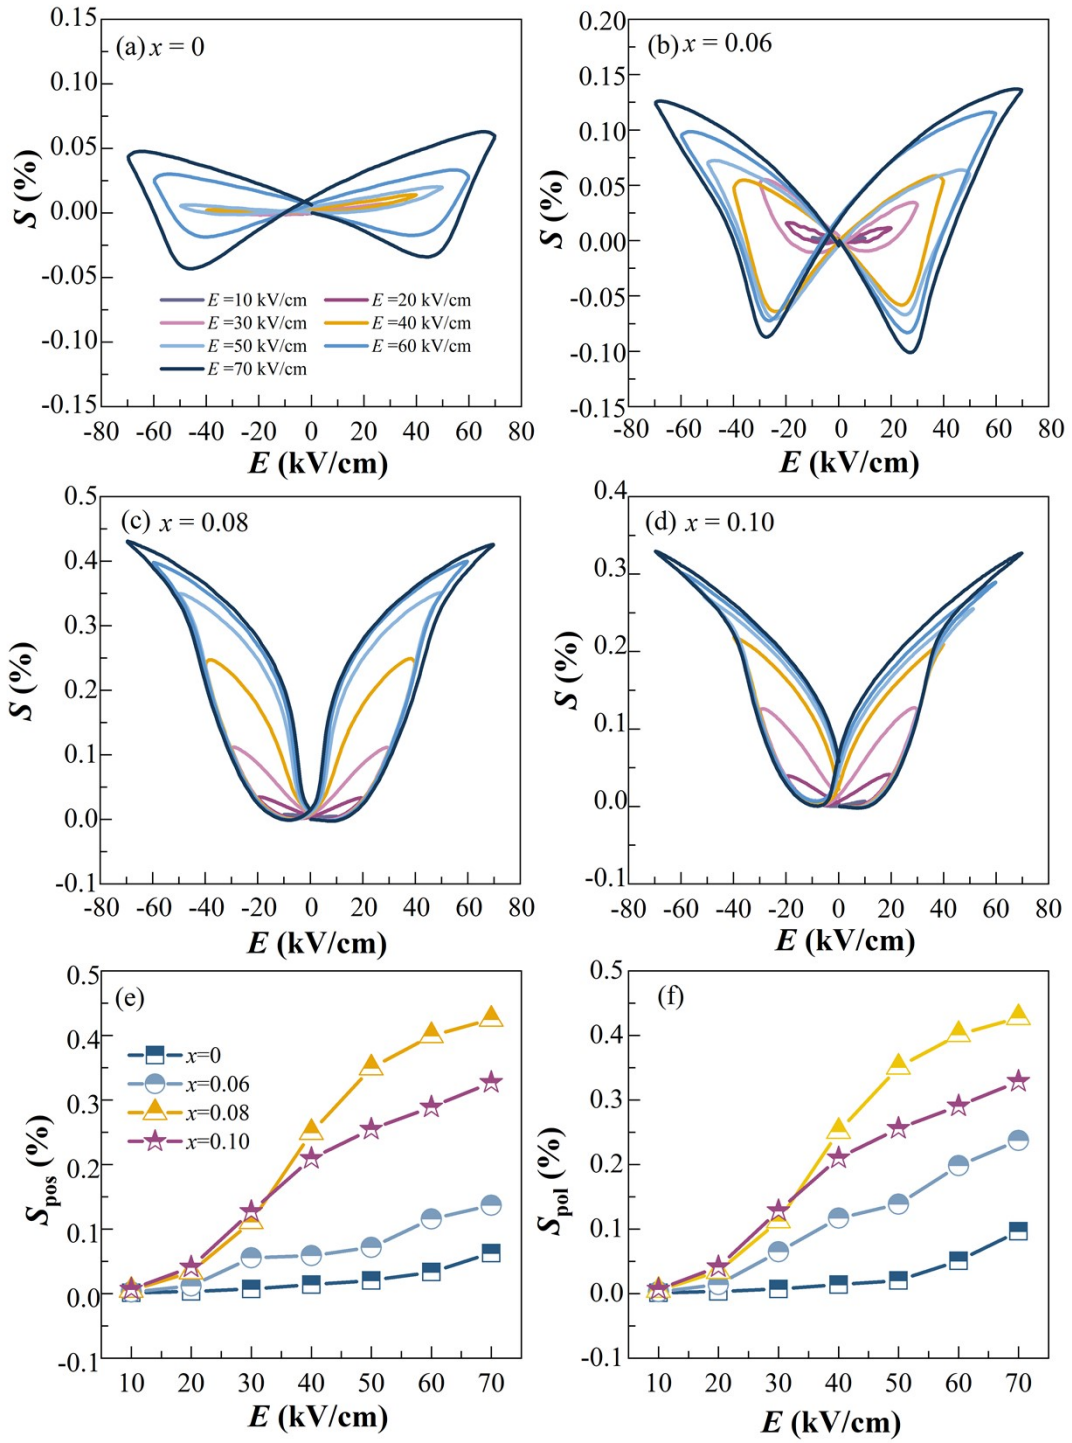

**FIGURE S6** Bipolar  $S$ - $E$  curves of the  $(1-x)$  BNT- $x$ BSTS ceramics as a function of the electric field: (a)  $x = 0$ , (b)  $x = 0.06$ , (c)  $x = 0.08$ , and (d)  $x = 0.10$ ; (e)  $S_{\text{pos}}$ , (f)  $S_{\text{pol}}$ .

**TABLE S1** Refinement results in (1-x) BNT-xBSTS ceramics

| Composition | Space group | a (Å)  | b (Å)  | c (Å)   | Content (%) | Sig    | $R_w$  |
|-------------|-------------|--------|--------|---------|-------------|--------|--------|
| $x = 0$     | <i>R3c</i>  | 5.4851 | 5.4851 | 13.5169 | 100         | 1.8384 | 8.0505 |
| $x = 0.02$  | <i>R3c</i>  | 5.4935 | 5.4935 | 13.5225 | 87.28       | 1.9233 | 7.6391 |
|             | <i>P4bm</i> | 5.4963 | 5.4963 | 3.8857  | 12.72       |        |        |
| $x = 0.04$  | <i>R3c</i>  | 5.4998 | 5.4998 | 13.5491 | 84.51       | 1.8799 | 7.2169 |
|             | <i>P4bm</i> | 5.5139 | 5.5139 | 3.9266  | 15.49       |        |        |
| $x = 0.06$  | <i>R3c</i>  | 5.5162 | 5.5162 | 13.5112 | 61.18       | 1.9321 | 8.1161 |
|             | <i>P4bm</i> | 5.5222 | 5.5222 | 3.8973  | 38.82       |        |        |
| $x = 0.08$  | <i>R3c</i>  | 5.5419 | 5.5419 | 13.6792 | 7.32        | 1.7027 | 6.5607 |
|             | <i>P4bm</i> | 5.5254 | 5.5254 | 3.9055  | 92.68       |        |        |
| $x = 0.10$  | <i>P4bm</i> | 5.5306 | 5.5306 | 3.9122  | 96.18       | 1.9262 | 8.0414 |
|             | <i>P4mm</i> | 3.9579 | 3.9579 | 3.9396  | 3.82        |        |        |
